# Supplementary material
Source: Springer Nature journal article supplement (https://www.springermedizin.de/resource/supplementary/12889_2012_4768_MOESM5_ESM.pdf/9493712)
Supplement: MOESM5 [file 9493712]

Length of hospital stay

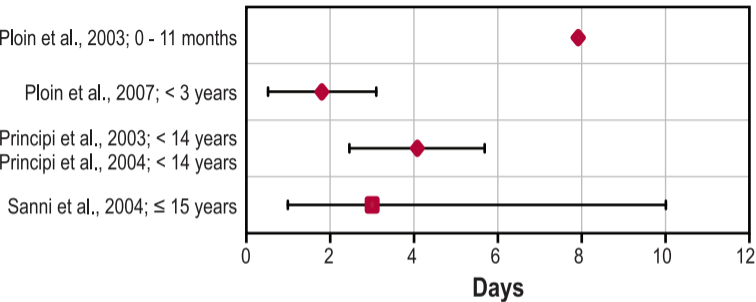

Mean number of medical visits

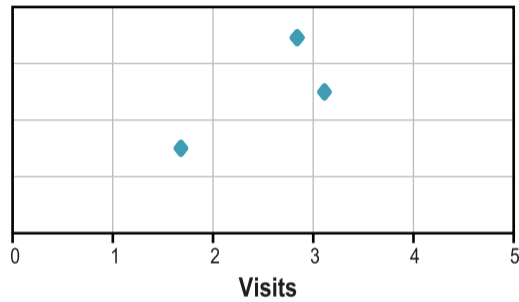

| Study                                            | Patient Age   | Influenza Cases | Country | Setting                    | Study Duration                  |
|--------------------------------------------------|---------------|-----------------|---------|----------------------------|---------------------------------|
| Ploin et al., 2003*                              | 0 - 11 months | 92              | France  | Paediatric ED              | Weeks 3 to 6 in 2002            |
| Ploin et al., 2007*                              | < 3 years     | 283             | France  | Paediatric ED <sup>†</sup> | Weeks 3 to 6 in 2002            |
| Principi et al., 2003;<br>Principi et al., 2004* | < 14 years    | 352             | Italy   | Primary care and ED        | 1 November 2001 - 30 April 2002 |
| Sanni et al., 2004                               | ≤ 15 years    | 59              | France  | Hospital                   | 1 January - 6 February 2002     |
